# Supplementary material for: Isocitrate Dehydrogenase Alpha-1 Modulates Lifespan and Oxidative Stress Tolerance in Caenorhabditis elegans
Source: MDPI journal article supplement (doi:10.3390/ijms24010612), 2022-12-29
Supplement: s1 [file s1]

**Figure S1. The images of the GFP expression patterns driven under *idha-1* promoter in the *Pidha-1::gfp* transgenic worm by fluorescent microscopy.**

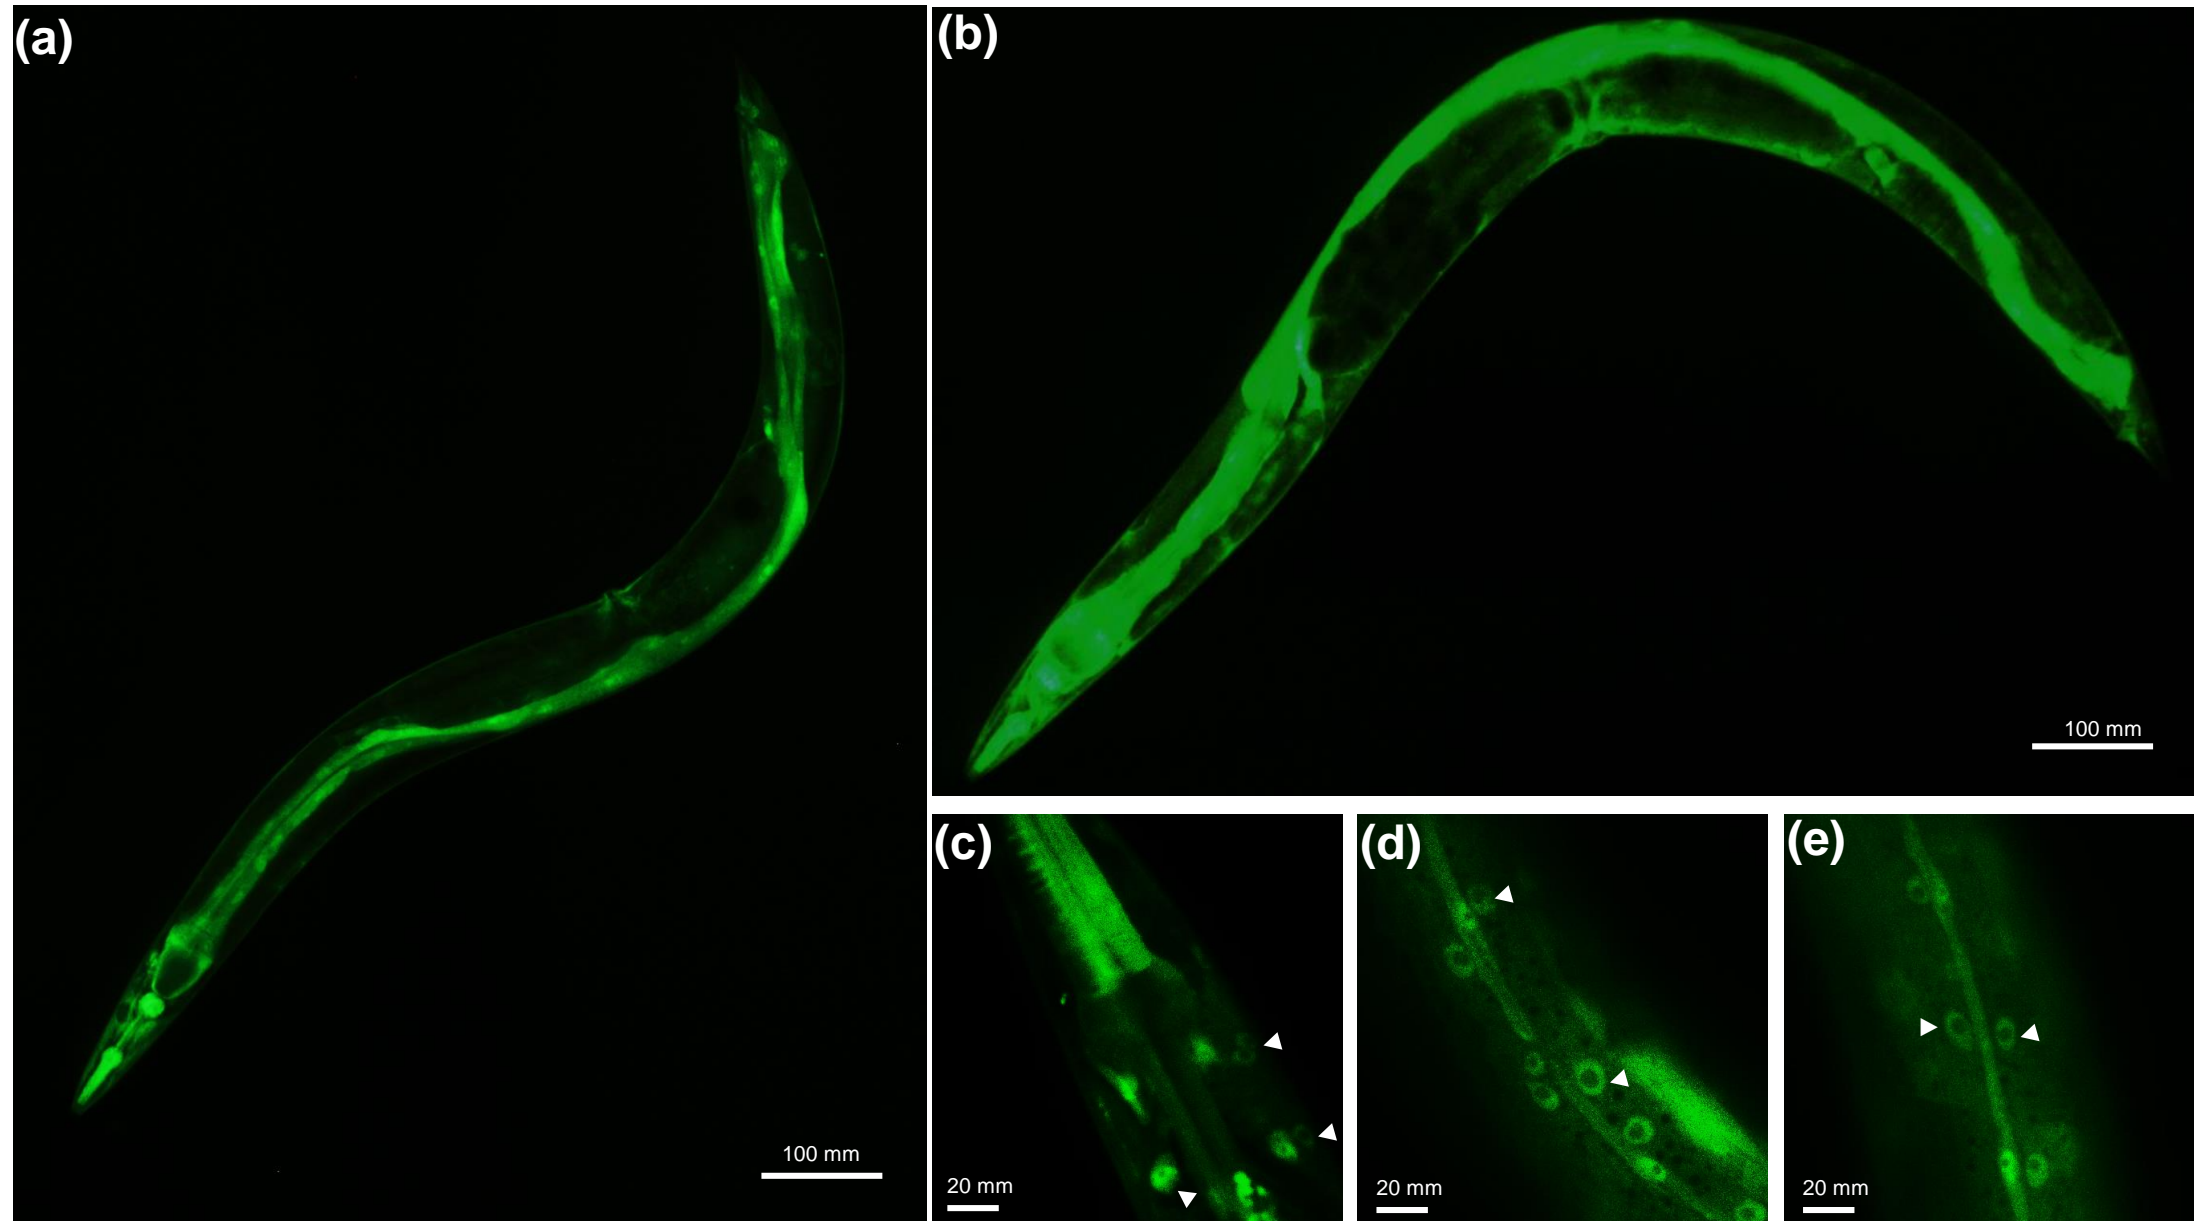

**Figure S2. Upregulated *idha-1* mRNA levels are detected in the DR treatment and DR models.**

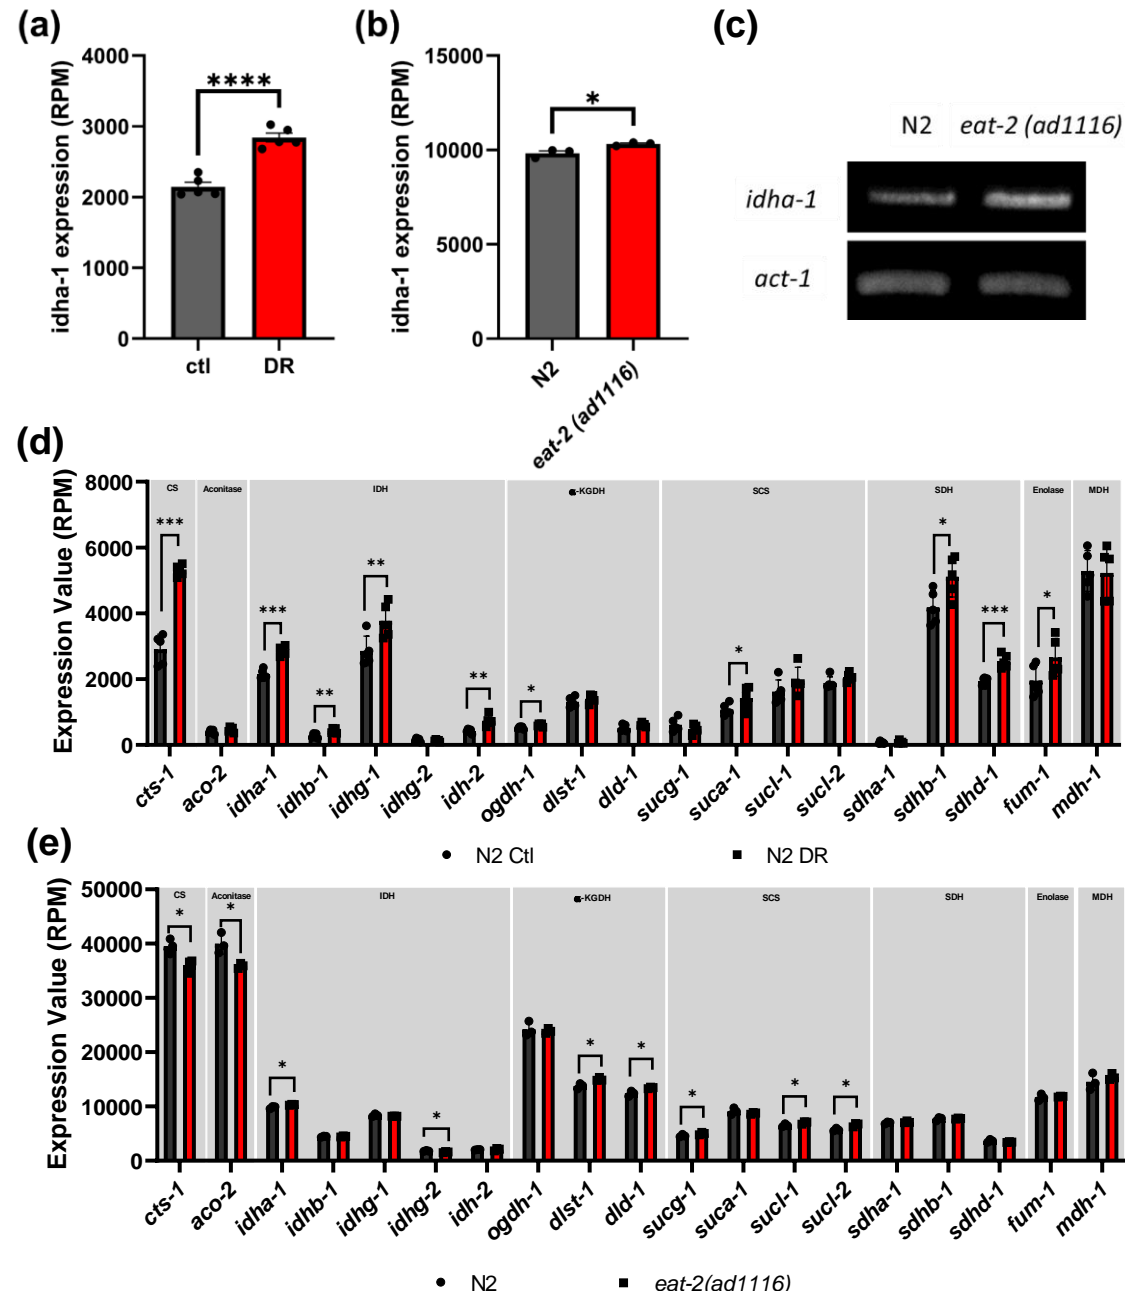

**Figure S3. IDHA-1 is conserved among the *Caenorhabditis* genus.**

**(a)**

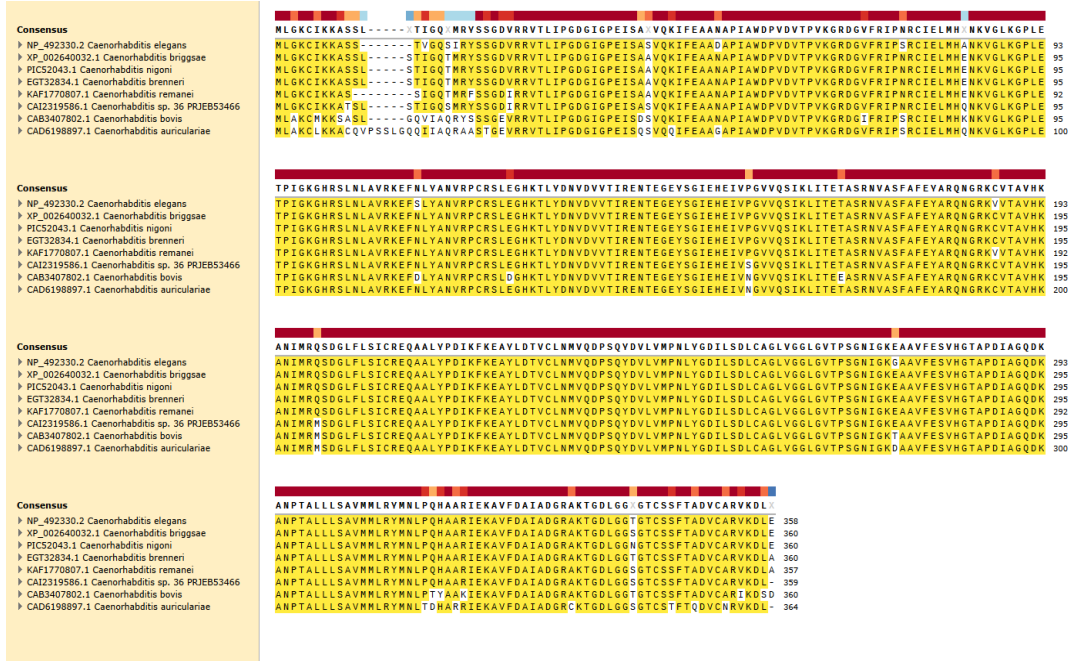

**(b)**

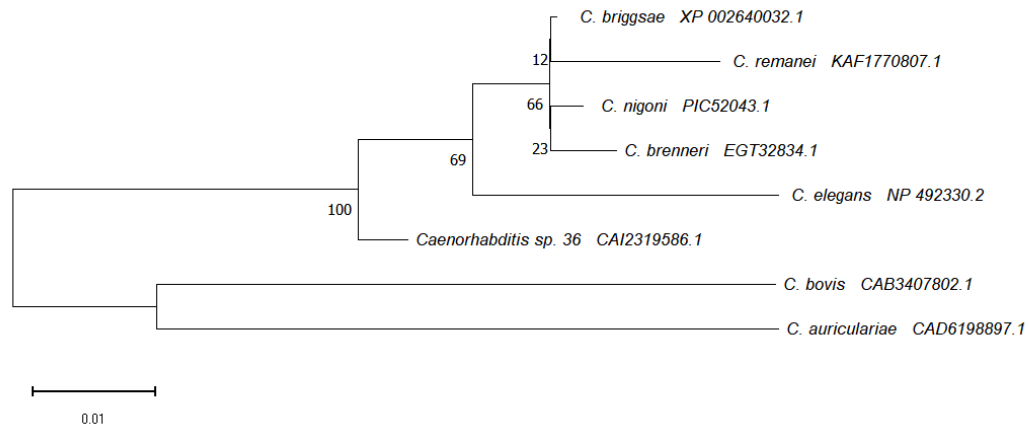

**Figure S4. The elevated NAD<sup>+</sup> levels are detected in *idha-1* overexpression transgenic worm.**

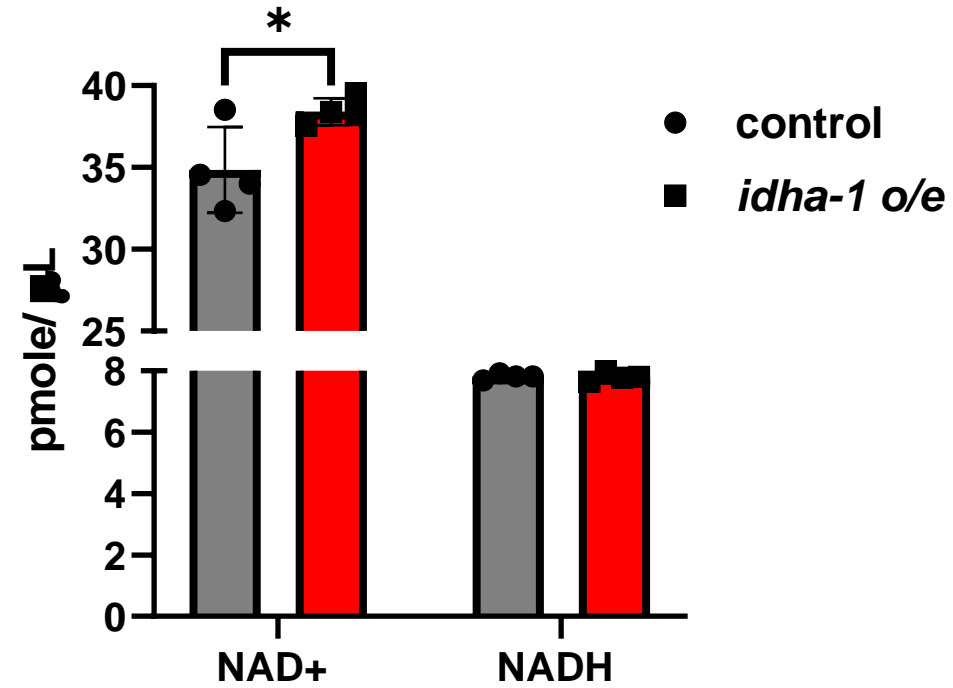

**Table S1. The summary of the lifespan assays in figure 1a, 1e, 4c, 5a, 5b, 5c.**

| Strain                                | Mean lifespan (day) | Change (%) | p-value      | Number of worms scored | Figure  |
|---------------------------------------|---------------------|------------|--------------|------------------------|---------|
| <i>Pidha-1::gfp</i>                   | 13.6                | -          | -            | 168                    | Fig. 1a |
| <i>Pidha-1::idha-1</i>                | 18.0                | 32.4       | p<0.0001**** | 175                    | Fig. 1a |
| N2 EV                                 | 20.1                | -          | -            | 169                    | Fig. 1e |
| N2 <i>idha-1(RNAi)</i> 5'             | 16.8                | -16.4      | p<0.0001**** | 173                    | Fig. 1e |
| N2 <i>idha-1(RNAi)</i> 3'             | 16.3                | -19.4      | p<0.0001**** | 167                    | Fig. 1e |
| N2 EV                                 | 20.1                | -          | -            | 169                    | Fig. 4c |
| N2 <i>idha-1(RNAi)</i> 5'             | 16.8                | -16.4      | p<0.0001**** | 193                    | Fig. 4c |
| <i>eat-2(ad1116)</i> EV               | 25.7                | -          | -            | 113                    | Fig. 4c |
| <i>eat-2(ad1116) idha-1(RNAi)</i> 5'  | 20.8                | -19.1      | p<0.0001**** | 120                    | Fig. 4c |
| N2 EV                                 | 14.7                | -          | -            | 139                    | Fig. 5a |
| N2 <i>idha-1(RNAi)</i> 5'             | 11.3                | -23.1      | p<0.0001**** | 141                    | Fig. 5a |
| <i>daf-16(mu86)</i> EV                | 10.9                | -25.9      | p<0.0001**** | 121                    | Fig. 5a |
| <i>daf-16(mu86) idha-1(RNAi)</i> 5'   | 9.0                 | -38.8      | p<0.0001**** | 120                    | Fig. 5a |
| N2 EV                                 | 17.2                | -          | -            | 139                    | Fig. 5b |
| N2 <i>idha-1(RNAi)</i> 5'             | 12.2                | -29.1      | p<0.0001**** | 141                    | Fig. 5b |
| <i>aak-2(gt33)</i> EV                 | 12.2                | -29.1      | p<0.0001**** | 141                    | Fig. 5b |
| <i>aak-2(gt33) idha-1(RNAi)</i> 5'    | 10.8                | -37.2      | p<0.0001**** | 117                    | Fig. 5b |
| N2 EV                                 | 16.4                | -          | -            | 118                    | Fig. 5c |
| N2 <i>idha-1(RNAi)</i> 5'             | 12.1                | -26.2      | p<0.0001**** | 119                    | Fig. 5c |
| <i>rsks-1(ok1255)</i> EV              | 18.1                | 10.4       | p<0.05*      | 122                    | Fig. 5c |
| <i>rsks-1(ok1255) idha-1(RNAi)</i> 5' | 16.3                | -0.6       | p=0.052      | 122                    | Fig. 5c |
